# Supplementary material
Source: publisher figshare collection journal article supplement (https://acs.figshare.com/ndownloader/files/3749362)
Supplement: Supplementary file 1 [file 3749362]

# Influence of sulfide nanoparticles on dissolved mercury and zinc quantification by diffusive gradient in thin-films (DGT) passive samplers

Anh Le-Tuan Pham <sup>1, £, \*</sup>, Carol Johnson <sup>1</sup>, Devon Manley <sup>1</sup>, and Heileen Hsu-Kim <sup>1,\*</sup>

<sup>1</sup> Department of Civil and Environmental Engineering, Duke University, Durham, NC 27503, USA

<sup>£</sup> Current address: Department of Civil and Environmental Engineering, Carleton University, Ottawa, ON K1S 5B6, Canada

## Supporting Information

*(Manuscript prepared for submission to Environmental Science and Technology)*

**13 pages, Tables S1 & S2, and Figures S1 – S6.**

\*Corresponding authors: Anh Le-Tuan Pham (email: [a.pham@carleton.ca](mailto:a.pham@carleton.ca); phone: +1-613-520-2600 (ext. 2984); Heileen Hsu-Kim (email: [hsukim@duke.edu](mailto:hsukim@duke.edu); phone +1-919-660-5109).

**A. Speciation of dissolved Hg(II) and Zn(II) in the DGT uptake experiments.** The speciation of dissolved Hg(II) and Zn(II) were calculated employing equilibrium constants shown in Table S1 and S2, respectively, and were performed with MINEQL+ (v. 4.6) <sup>1</sup>.

**Table S1.** Stability constants employed to calculate the speciation of dissolved Hg(II) in the DGT uptake experiments. The concentrations of Hg(II) and ligands in the calculation were as follow: [total dissolved Hg(II)] = 5 nM; [NO<sub>3</sub><sup>-</sup>] = 10 mM; [SRHA] = 1 mgC/L = 1.34 μM (assuming that the C content of SRHA is 53 wt.%, and the molecular weight of SRHA is 1399 Da) <sup>2</sup>; pH = 7.6.

*MINEQL+ predicted that 100% of Hg in the solution is associated with SRHA.*

| Reaction                                                                                       | Log K  | Reference |
|------------------------------------------------------------------------------------------------|--------|-----------|
| $\text{Hg}^{2+} + \text{H}_2\text{O} \Leftrightarrow \text{HgOH}^+ + \text{H}^+$               | -3.40  | 1         |
| $\text{Hg}^{2+} + 2 \text{H}_2\text{O} \Leftrightarrow \text{Hg}(\text{OH})_2^0 + 2\text{H}^+$ | -6.2   | 1         |
| $\text{Hg}^{2+} + 3\text{H}_2\text{O} \Leftrightarrow \text{Hg}(\text{OH})_3^- + 3\text{H}^+$  | -21.1  | 1         |
| $\text{Hg}^{2+} + \text{NO}_3^- \Leftrightarrow \text{HgNO}_3^+$                               | -0.434 | 1         |
| $\text{Hg}^{2+} + 2\text{NO}_3^- \Leftrightarrow \text{Hg}(\text{NO}_3)_2^0$                   | -0.814 | 1         |
| $\text{Hg}^{2+} + \text{SRHA} \Leftrightarrow \text{HgSRHA}$                                   | 22.5   | 2         |

**Table S2.** Stability constants employed to calculate the speciation of dissolved Zn(II) in the DGT uptake experiments. The concentrations of Zn(II) and ligands in the calculation were as follow: [total dissolved Zn(II)] = 1  $\mu$ M; [NO<sub>3</sub><sup>-</sup>] = 10 mM; [SRHA] = 1 mgC/L = 1.34  $\mu$ M (assuming that the C content of SRHA is 53 wt.%, and the molecular weight of SRHA is 1399 Da)<sup>2</sup>; pH = 7.6.

*MINEQL+ predicted that ca. 31% of Zn in the solution is associated with SRHA, while 65%, 2.5%, and 1.5% of Zn exists as Zn<sup>2+</sup>, ZnOH<sup>+</sup>, and ZnNO<sub>3</sub><sup>+</sup>, respectively.*

| Reaction                                                                                            | Log K | Reference |
|-----------------------------------------------------------------------------------------------------|-------|-----------|
| $\text{Zn}^{2+} + \text{H}_2\text{O} \rightleftharpoons \text{ZnOH}^+ + \text{H}^+$                 | -9.0  | 1         |
| $\text{Zn}^{2+} + 2 \text{H}_2\text{O} \rightleftharpoons \text{Zn}(\text{OH})_2^0 + 2\text{H}^+$   | -17.8 | 1         |
| $\text{Zn}^{2+} + 3\text{H}_2\text{O} \rightleftharpoons \text{Zn}(\text{OH})_3^- + 3\text{H}^+$    | -28.1 | 1         |
| $\text{Zn}^{2+} + 4\text{H}_2\text{O} \rightleftharpoons \text{Zn}(\text{OH})_4^{2-} + 4\text{H}^+$ | -40.5 | 1         |
| $\text{Zn}^{2+} + \text{NO}_3^- \rightleftharpoons \text{ZnNO}_3^+$                                 | 0.3   | 1         |
| $\text{Zn}^{2+} + 2\text{NO}_3^- \rightleftharpoons \text{Zn}(\text{NO}_3)_2^0$                     | -0.4  | 1         |
| $\text{Zn}^{2+} + (\text{SRHA}_1) \rightleftharpoons \text{Zn}(\text{SRHA}_1)$                      | 5.25* | 3         |
| $\text{Zn}^{2+} + (\text{SRHA}_2) \rightleftharpoons \text{Zn}(\text{SRHA}_2)$                      | 6.86* | 3         |

\*We performed a thorough literature search for the stability constants of Zn-SRHA complexes but were not able to find one. Therefore, the stability constant values reported by Cheng and Allen (2006)<sup>3</sup>, who studied zinc complexation by dissolved organic matter from different surface waters, were employed in our calculation. In the study by Cheng and Allen, the Zn-NOM titration data was best fitted by a 2-site model in which NOM is consisted of two types of binding site (denoted as SRHA<sub>1</sub> and SRHA<sub>2</sub> in Table S2). The average site concentrations and the respective stability constant values reported by Cheng and Allen (Table 2 in that study)<sup>3</sup> were utilized for Zn(II) speciation calculation. They are: [SRHA<sub>1</sub>] = 2.06 mmol/g C = 2.06  $\mu$ M; [SRHA<sub>2</sub>] = 0.12 mmol/g C = 0.12  $\mu$ M; logK<sub>Zn(SRHA1)</sub> = 5.25; logK<sub>Zn(SRHA2)</sub> = 6.86.

**B. Characterization of HgS and ZnS nanoparticles.** Transmission electron microscopy (TEM) was used to image and analyze the nanoparticles for size, composition (via energy dispersive spectroscopy, EDS), and structure (via selected area electron diffraction, SAED, and fast Fourier transform of high resolution images, FFT). TEM grids (ultrathin carbon film, ~3-5 nm thick, on copper mesh) held by reverse-action tweezers were dipped into the nanoparticle suspensions, swirled for a few seconds, removed, wicked gently with a lint-free wipe, and rinsed two times with ultrapure water to remove salts. The wicking process helps prevent aggregation via the “coffee ring” drying effect. Grids were analyzed on a JEOL 2100 operated at 200kV. HgS nanoparticles are shown in Figure S1. The average particle size is  $6.3(\pm 2.3)$  nm as measured from 29 particles in 5 images, and particles are generally dispersed though sometimes appear in loose aggregates (possible drying artifact). Both SAED and FFT patterns are insufficient to identify whether the HgS particles are cinnabar or metacinnabar, which agrees with previous work using EXAFS showing that the Hg-S bond distance is in-between that of cinnabar and metacinnabar.<sup>4</sup>

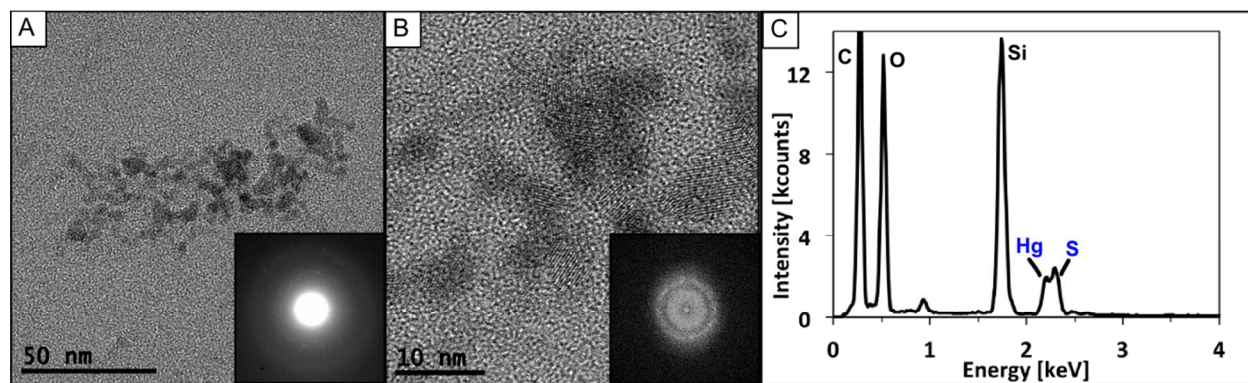

**Figure S1.** TEM of HgS nanoparticles, 3 days aged. (A) TEM image of an aggregate of ~ 5 nm HgS, with an inset of the SAED pattern showing a few crystalline spots; (B) high resolution (HR-TEM) image of the same particles with lattice fringes visible indicating crystallinity, with an inset of the FFT of that image showing crystalline spots as well. (C) EDS spectrum verifying that the particles are composed of Hg and S. The source of the Si peak is unknown but could be contamination from water or glassware.

ZnS nanoparticles are shown in Figure S2. The average size is  $3.7(\pm 1.5)$  nm as measured from 43 particles in 3 images, and particles are very dispersed throughout the grid. Their dispersity and extremely small size made it extremely difficult to get enough signal for EDS and SAED, and only the rare large aggregate allowed for these analyses (Figure S2B and C). The crystalline phase could not be conclusively identified as wurtzite or sphalerite by SAED. High resolution TEM was also difficult and did not reveal any lattice fringes, but particles of that size can be quite unstable under the electron beam. These results match with previous studies on HgS and ZnS nanoparticles.<sup>4,5</sup>

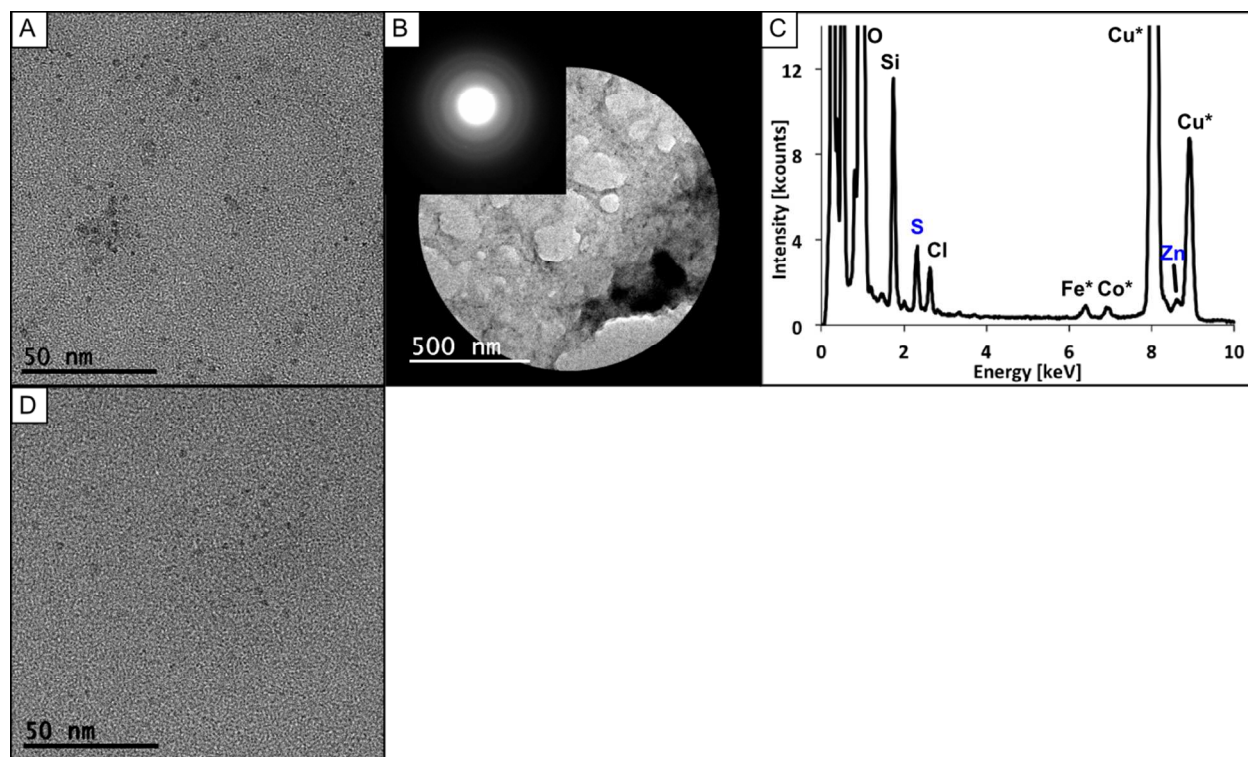

**Figure S2.** TEM of ZnS nanoparticles, fresh (A-C) & 4 days aged (D). (A, D) TEM images showing monodispersed nanoparticles smaller than 5 nm; (B) image of a thick aggregate of Suwannee River Humic Acid (SRHA) and ZnS nanoparticles (selected area aperture visible) with an inset of the SAED pattern; (C) EDS spectrum showing the presence of Zn and S (Fe and Co in equal heights are from the instrument, Cu is from the TEM grid).

**C. Synthesis of 3-mercaptopropyl functionalized silica gel (Si-SH).** Si-SH beads were synthesized in our laboratory according to the procedure reported in Quang *et al.*<sup>6</sup> Briefly, 5 grams of silica gel (200 – 400 mesh, Sigma Aldrich Inc.) was added to a mixture of 2 g H<sub>2</sub>O, 5 g ethanol, and 3 g 3-mercaptopropyltrimethoxysilane (Aldrich). The resulted suspension was aged at 50 °C for 40 h, and the supernatant was decanted to retrieve the Si-SH beads. In the final step, the Si-SH beads were washed 3 times with ethanol and freeze-dried.

**D. Preparation of the DGT sampler.** The samplers consisted of a 0.45 µm nitrocellulose membrane filter (Fisher Scientific), an agarose diffusion layer, and a metal binding layer enclosed in a plastic casing that was purchased from DGT Research Ltd. (Lancaster, UK) The agarose diffusion layer was prepared by dissolving 0.15 g of agarose in 10 g of water, and the solution was cast between two glass plates that were separated from each other by 0.75 mm-thick spacers. After 1 h, the agarose gel was retrieved and cut into small disks ready for DGT sampler assembly. The obtained agarose gel was 0.75 mm thick, which is a typical thickness of diffusion layer used in DGT sampler.

The binding layer was prepared by mixing 2 g of the Si-SH beads with 10 g of solution of 15% acrylamide/bis acrylamide. Polymerization was initiated by adding 70 µL of an aqueous solution of 1% ammonium persulfate (NH<sub>4</sub>)<sub>2</sub>S<sub>2</sub>O<sub>8</sub> and 40 µL of tetramethylethylenediamine, and the suspension was cast between two glass plates that were separated from each other by 0.75 mm-thick spacers. After approximately 1.5 h, the obtained Si-SH-containing polyacrylamide gel (*i.e.*, the binding layer) was retrieved and cut into small disks. The disks were hydrated in 10 mM NaNO<sub>3</sub> for 24 h and subsequently used for DGT sampler assembly.

**E. Metal uptake tests to examine the performance of the binding layer.** The ability of the binding layer disks in binding Zn and Hg was examined by submerging them into solutions of

different concentrations of dissolved Zn(II) and Hg(II), and measuring for mass of metals accumulated on each disk. In the Zn uptake study, experiments were conducted in 15 mL plastic centrifuge tubes containing 10 mL of solution of 10 mM NaNO<sub>3</sub> (background electrolyte), 2 mM HEPES (buffer, pH = 7.6 – 7.7), and 5 – 40 μM Zn(NO<sub>3</sub>)<sub>2</sub>. A binding layer disk was added to each test tube, and the tube was tumbled end-over-end for 3 days. Subsequently, the binding layer was retrieved and digested with a mixture of 1:1 (v/v) of 37 wt.% HCl and 70 wt.% HNO<sub>3</sub> stock solutions, and the amount of Zn in the digestate was quantified using inductively coupled plasma mass spectrometry (ICP-MS). The amount of Zn remaining in the test solution was also quantified in order to complete mass balance and predict the amount of Zn that should have accumulated on the binding layers.

The Hg uptake study was carried similarly to the Zn uptake study, with the following modifications: 1) experiments were conducted in 44 mL certified Hg-free glass vials (Merx-T, brand) containing 40 mL of solution of 10 mM NaNO<sub>3</sub> (background electrolyte), 0.5 mM NaHCO<sub>3</sub> (buffer, pH = 7.6 – 7.7), and 1 – 10 nM Hg(NO<sub>3</sub>)<sub>2</sub>; 2) the test tubes were tumbled end-over-end for 5 days; 3) Hg was measured using cold vapor atomic fluorescence spectrometry following method 1631 (Environmental Protection Agency)<sup>7</sup>; and 4) both the amounts of Hg remained in the test solution and Hg sorbed to the test tube walls were quantified to complete mass balance and predict for the amount of Hg that should have accumulated on the binding layers.

The results of these experiments, presented in Figure S2 and S3, indicated that the binding layers were effective in taking up Zn and Hg, and that digestion by aqua regia was effective in eluting the bound metals from the binding layers.

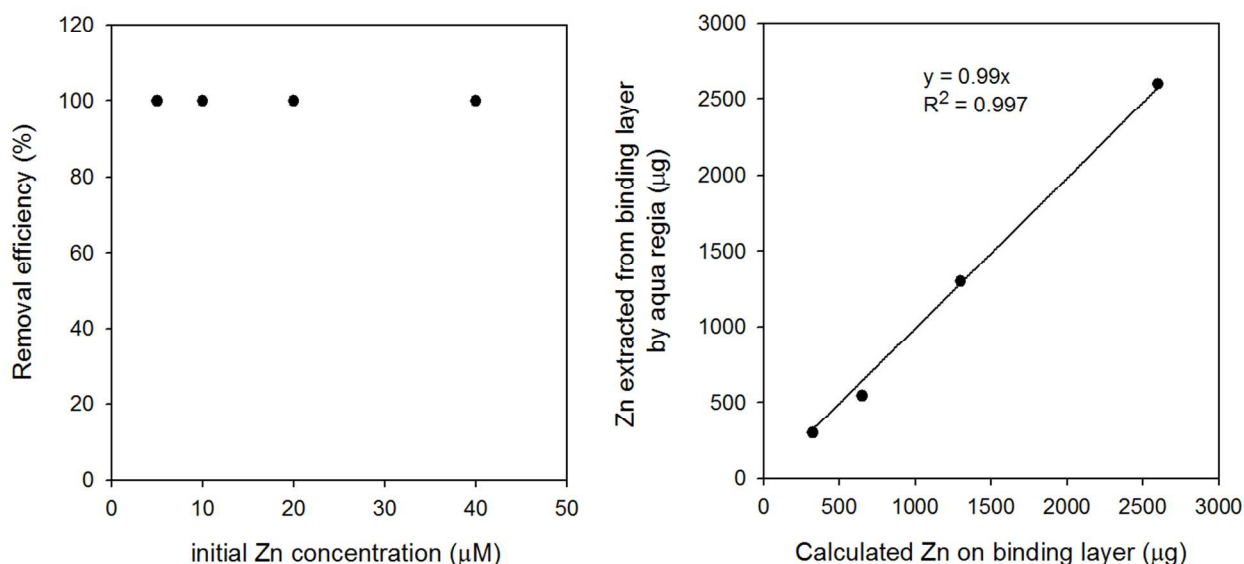

**Figure S3.** Removal efficiency of dissolved Zn(II) by binding layer disks from solutions containing  $[\text{Zn(II)}]_0 = 5 - 40 \mu\text{M}$  (left), and elution efficiency by aqua regia (right). An elution efficiency of 99% was obtained. The amounts of Zn accumulated on the binding layers (the x-axis of the figure on the right) were calculated by subtracting the mass of Zn(II) left from the amount initially present in the solution.

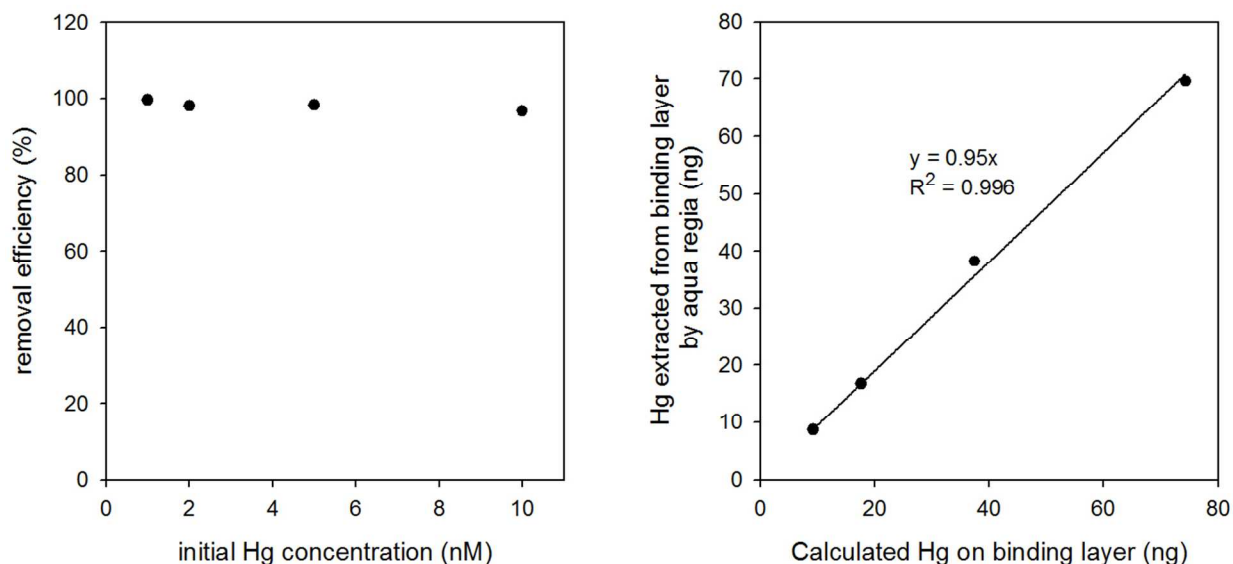

**Figure S4.** Removal efficiency of dissolved Hg(II) by binding layer disks from solutions containing  $[\text{Hg(II)}]_0 = 1 - 10 \text{ nM}$  (left), and elution efficiency by aqua regia (right). An elution efficiency of 95% was obtained. The amounts of Hg accumulated on the binding layers (x-axis of the figure on the right) were calculated by subtracting the mass of Hg(II) left in the solution and adsorbed on the test tube walls from the amount initially present in the solution.



**F. Elution of metals from the filter and agarose layers.** In the DGT uptake experiments, Zn and Hg accumulated on the filter and agarose layers were eluted by acid solutions of 0.19 wt.% HCl and 1.4 wt.% HNO<sub>3</sub> (for elution of metals on the filters), or 37 wt.% HCl (for metal release following complete dissolution of agarose).

**G. Calculation of diffusion coefficient *D*.** The diffusion coefficients were calculated employing the rearranged form of equation (1) in the main text:

$$\frac{m}{C_b} = \frac{D \times A}{\Delta g} \times t \quad (2)$$

where *m* is mass of metal accumulated on the binding layer, *C<sub>b</sub>* is the concentration of dissolved metal in the bulk solution (measured by filtration or anodic stripping voltammetry), *D* is the diffusion coefficient, *A* is the sampling area (*A* = 3.14 cm<sup>2</sup>), *t* is the deployment time, and  $\Delta g$  is the thickness of the diffusion layer (*i.e.*,  $\Delta g$  = the thickness of agarose diffusion layer + membrane filter + stagnant liquid layer on the surface of the DGT sampler = 0.75 + 0.15 + 0.53\* = 1.43 mm).

Based on equation (2), the slopes of the regression lines in Figure 1C and 2C are equaled to  $\frac{D \times A}{\Delta g}$ . Thus, the diffusion coefficients *D* can be readily calculated.

\* The thickness  $\delta$  of the stagnant liquid layer was determined according to the procedure described by Zhang and Davison.<sup>8</sup> Briefly,  $\delta$  can be determined by conducting DGT uptake experiments using samplers constructed from agarose diffusion layers that have different thickness, and employing the rearranged form of equation (1):

$$\frac{1}{m} = \frac{\Delta \alpha}{D \times C_b \times t \times A} + \frac{\delta}{D \times C_b \times t \times A} \quad (2)$$

where  $\Delta\alpha$  = the thickness of agarose layer + membrane filter.  $\Delta\alpha$  can be varied by using agarose layers of different thicknesses. Thus,  $\delta$  can be determined by plotting  $1/m$  vs.  $\Delta\alpha$ . From a Zn uptake test,  $\delta$  was found to be 0.53 mm under experimental conditions employed in this study (Figure S5).

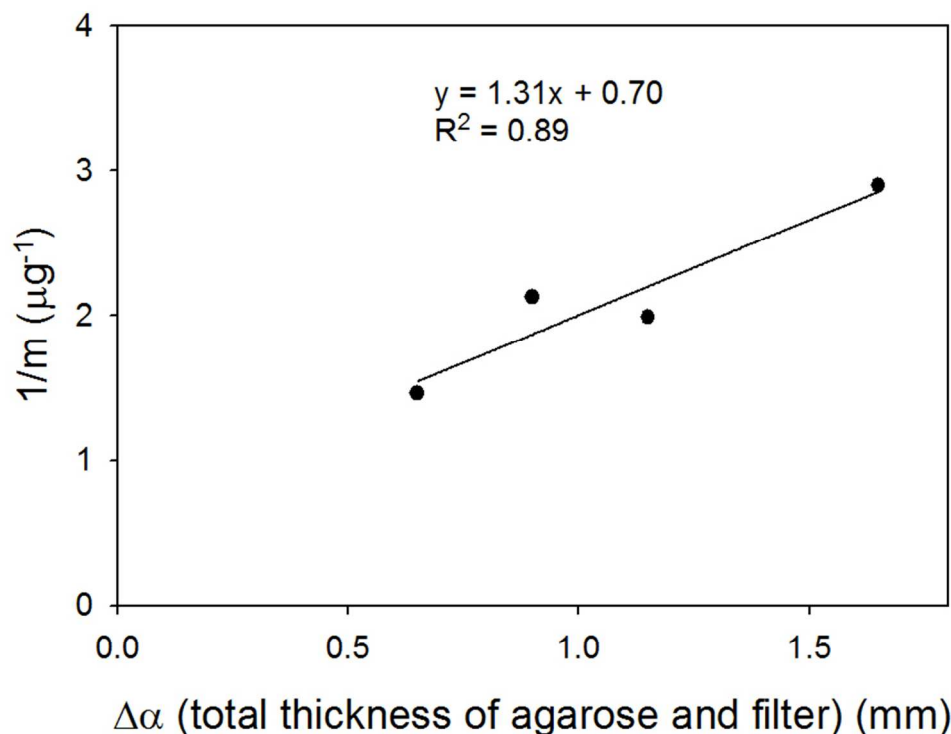

**Figure S5.** Uptake of dissolved Zn(II) by DGT samplers constructed with agarose layers of different thicknesses (i.e., 0.5, 0.75, 1, and 1.5 mm). All solutions contained 10 mM NaNO<sub>3</sub>, 2 mM HEPES (pH = 7.5 – 7.7), and 1  $\mu\text{M}$  Zn(NO<sub>3</sub>)<sub>2</sub>. After 22 h, DGT samplers were retrieved to determine the mass of Zn accumulated on the binding layer ( $m$ ). Using the intersection and slope of the regression line, the thickness  $\delta$  of the stagnant liquid layer was found to be  $\delta = 0.7/1.31 = 0.53$  mm.

172

173

174

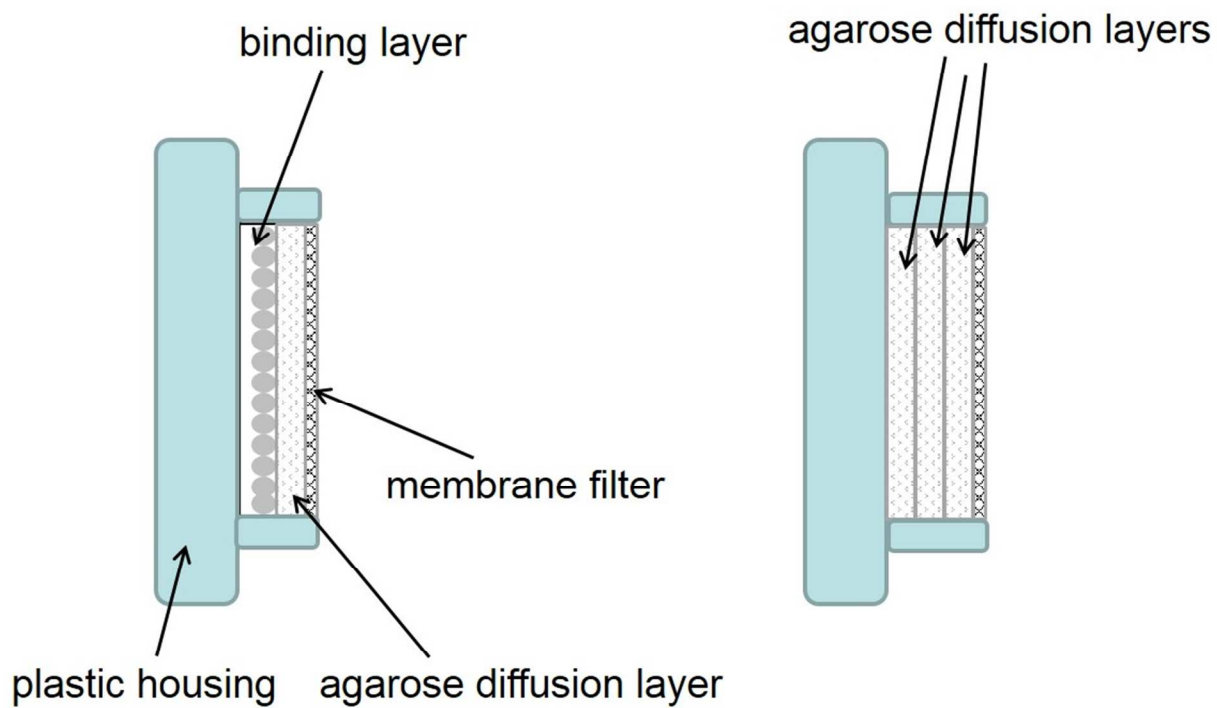

175

176 **Figure S6.** The structure of a normal DGT sampler (left) and a modified DGT sampler (right).  
177 The modified sampler (m-DGT) has three agarose diffusion layers but no binding layer.

## References

1. Schecher, W. D., MINEQL+: A chemical equilibrium program for personal computers; Environmental Research Software, Hallowell, ME. 2001.
2. Haitzer, M.; Aiken, G. R.; Ryan, J. N.; Binding of Mercury(II) to Aquatic Humic Substances: Influence of pH and Source of Humic Substances. *Environmental Science and Technology*. **2003**, 37, 2436-2441.
3. Cheng, T.; Allen, H. E.; Comparison of zinc complexation properties of dissolved natural organic matter from different surface waters. *Journal of Environmental Management*. **2006**, 80, 222-229.
4. Pham, A. L.-T.; Morris, A.; Zhang, T.; Ticknor, J.; Levard, C.; Hsu-Kim, H. Precipitation of nanoscale mercuric sulfides in the presence of natural organic matter: Structural properties, aggregation, and biotransformation. *Geochimica et Cosmochimica Acta*. **2014**, 133, 204-215
5. Deonarine, A.; Lau B. L. T.; Aiken, G. R.; Ryan, J. N.; Hsu-Kim H. Effects of humic substances on precipitation and aggregation of zinc sulfide nanoparticles. *Environmental Science and Technology*. **2011**, 45 (8), 3196 – 3201.
6. Quang, D. V.; Lee, J. E.; Kim, J.; Kim, Y. N.; Shao, G. N.; Kim, H. T. A gentle method to graft thiol-functional groups onto silica gel for adsorption of silver ions and immobilization of silver nanoparticles. *Powder Technology*. **2013**, 235, 221-227.
7. *Method 1631, Revision D: Mercury in Water by Oxidation, Purge and Trap, and Cold Vapor Atomic Fluorescence Spectroscopy*; U.S. Environmental Protection Agency: Washington, DC, 2001.

199 8. Zhang, H.; Davison, W. Performance characteristics of diffusion gradients in thin films for the  
200 in situ measurement of trace metals in aqueous solution. *Analytical Chemistry*. **1995**, 67, 3391-  
201 3400.
